# Supplementary material for: Process of lignin oxidation in an ionic liquid coupled with separation
Source: Royal Society of Chemistry journal article supplement (doi:10.1039/c3ra40391b), 2013-01-01
Supplement: c3ra40391b.pdf [file c3ra40391b.pdf]

### Supporting Information

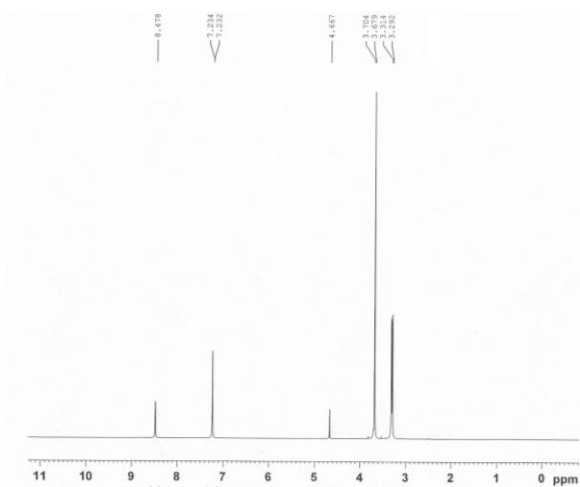

S-Figure 1. <sup>1</sup>H NMR of IL [mmim][Me<sub>2</sub>PO<sub>4</sub>]

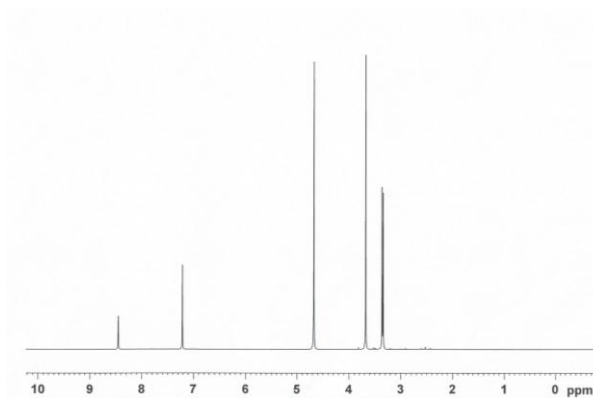

S-Figure 2. <sup>1</sup>H NMR of the six recycle IL [mmim][Me<sub>2</sub>PO<sub>4</sub>]

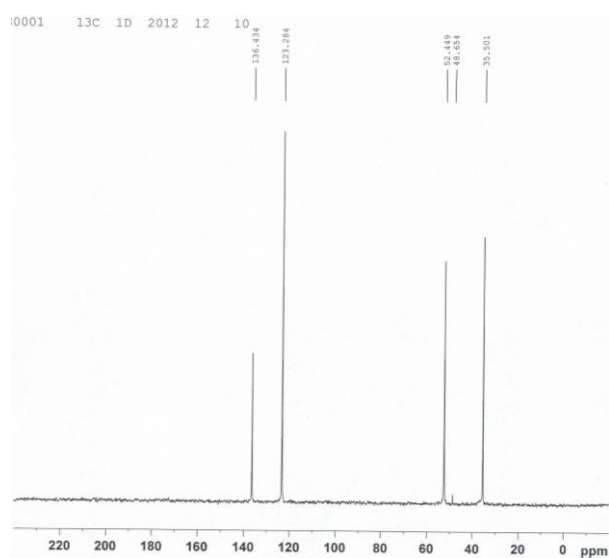

S-Figure 3. <sup>13</sup>C NMR of IL [mmim][Me<sub>2</sub>PO<sub>4</sub>]

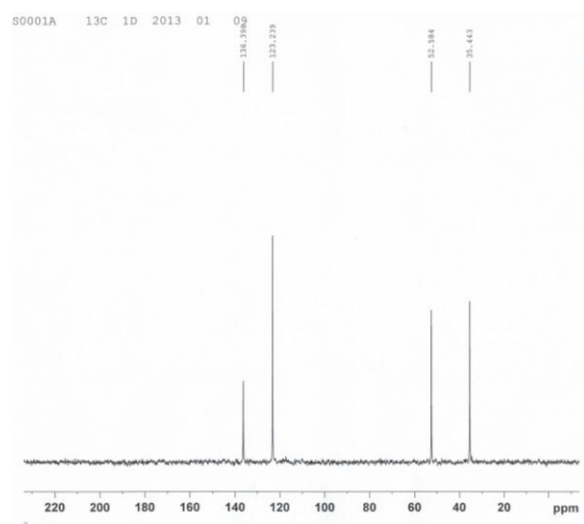

S-Figure 4.  $^{13}\text{C}$  NMR of the six recycle IL [mmim][ $\text{Me}_2\text{PO}_4$ ]

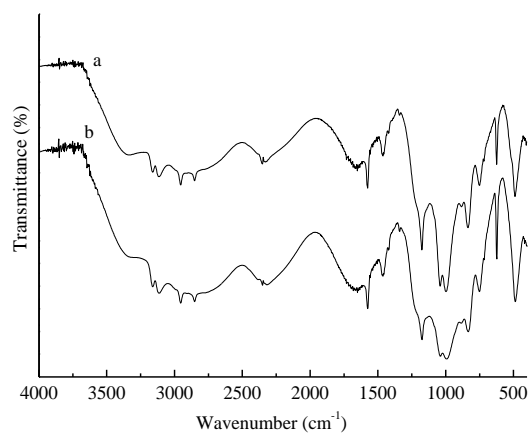

S-Figure 5. FT-IR spectra of IL [mmim][ $\text{Me}_2\text{PO}_4$ ] (a: New IL, b: Reused IL for six times)

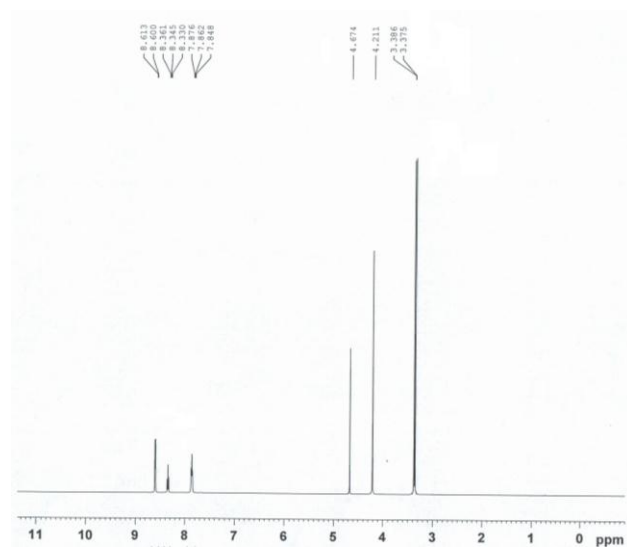

S-Figure 6.  $^1\text{H}$  NMR of IL [mPy][ $\text{Me}_2\text{PO}_4$ ]



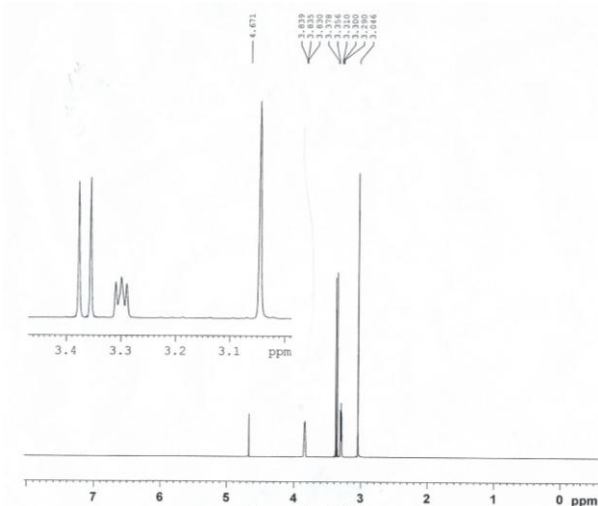

S-Figure 10.  $^1\text{H}$  NMR of IL [mmo][ $\text{Me}_2\text{PO}_4$ ]

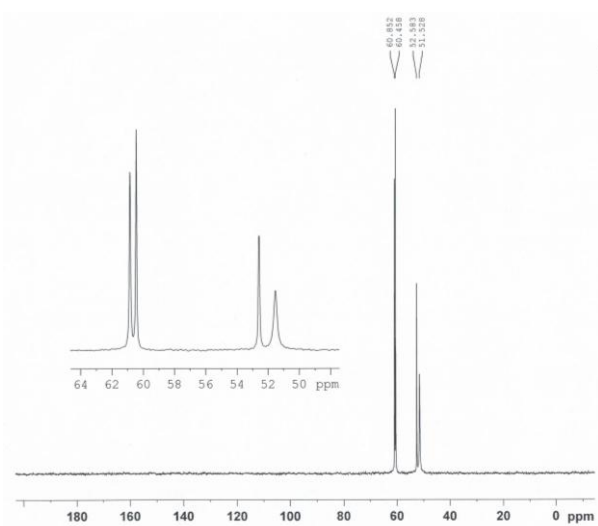

S-Figure 11.  $^{13}\text{C}$  NMR of IL [mmo][ $\text{Me}_2\text{PO}_4$ ]

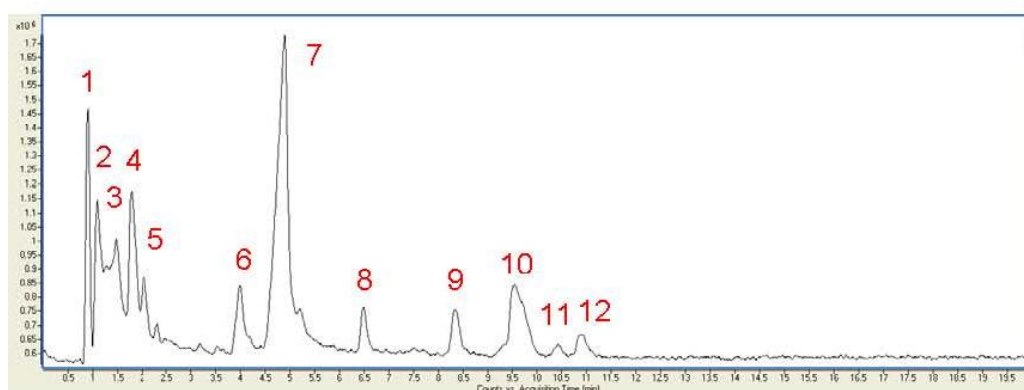

S-Figure 12. LC spectra of the products in NaOH aqueous solution

1: Methanol; 2: Unknown I (EIC = 257); 3: Unknown II (EIC = 301); 4: Syringe aldehyde (EIC = 181); 5: Unknown III (EIC = 271); 6: *p*-Hydroxybenzaldehyde (EIC = 121); 7: Vanillin (EIC = 151); 8: Unknown III (EIC = 165); 9: 3,5-Dimethoxybenzoic acid (EIC = 181); 10: Syringate (EIC = 197); 11: Unknown IV (EIC = 287); 12: *p*-Hydroxybenzoate (EIC = 137).

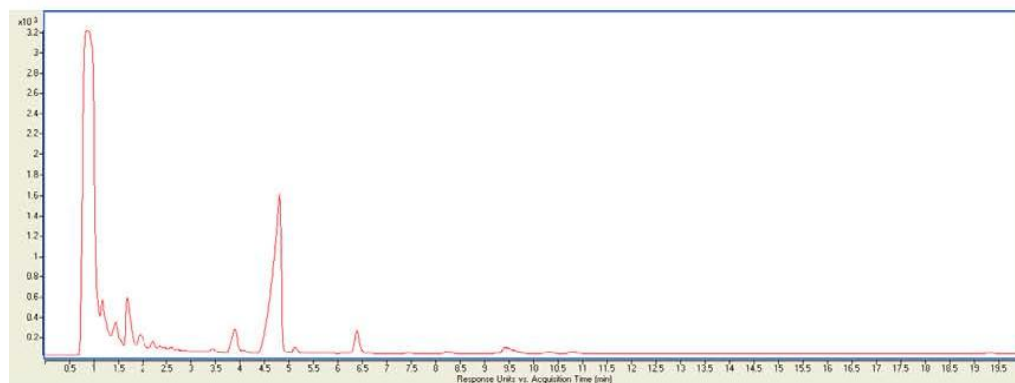

S-Figure 13. LC spectra of the products in the coupled process of reaction-separation
